# Supplementary material for: Differential Adhesive Properties of Sequestered Asexual and Sexual Stages of Plasmodium falciparum on Human Endothelial Cells Are Tissue Independent
Source: PubMed Central journal article supplement (PMC3283655; doi:10.1371/journal.pone.0031567), 2012-02-21

**ICAM-1 (CD54)**

Geometric Mean of Fluorescence

|          | constitutive | pos.cells (%) | TNF stimulated | pos.cells (%) |
|----------|--------------|---------------|----------------|---------------|
| HUVEC    | 44.73        | 7.99          | 261.91         | 84.34         |
| HDMEC    | 93.68        | 15.36         | 126.74         | 72.59         |
| HBMEC-60 | 48.11        | 3.96          | 238.12         | 96.65         |

**CD36**

Geometric Mean of Fluorescence

|          | constitutive | pos.cells (%) | TNF stimulated | pos.cells (%) |
|----------|--------------|---------------|----------------|---------------|
| HUVEC    | 32.56        | 1.08          | 35.81          | 10.37         |
| HDMEC    | 251.53       | 33.35         | 480.65         | 45.59         |
| HBMEC-60 | 49.6         | 4.84          | 53.32          | 20.66         |

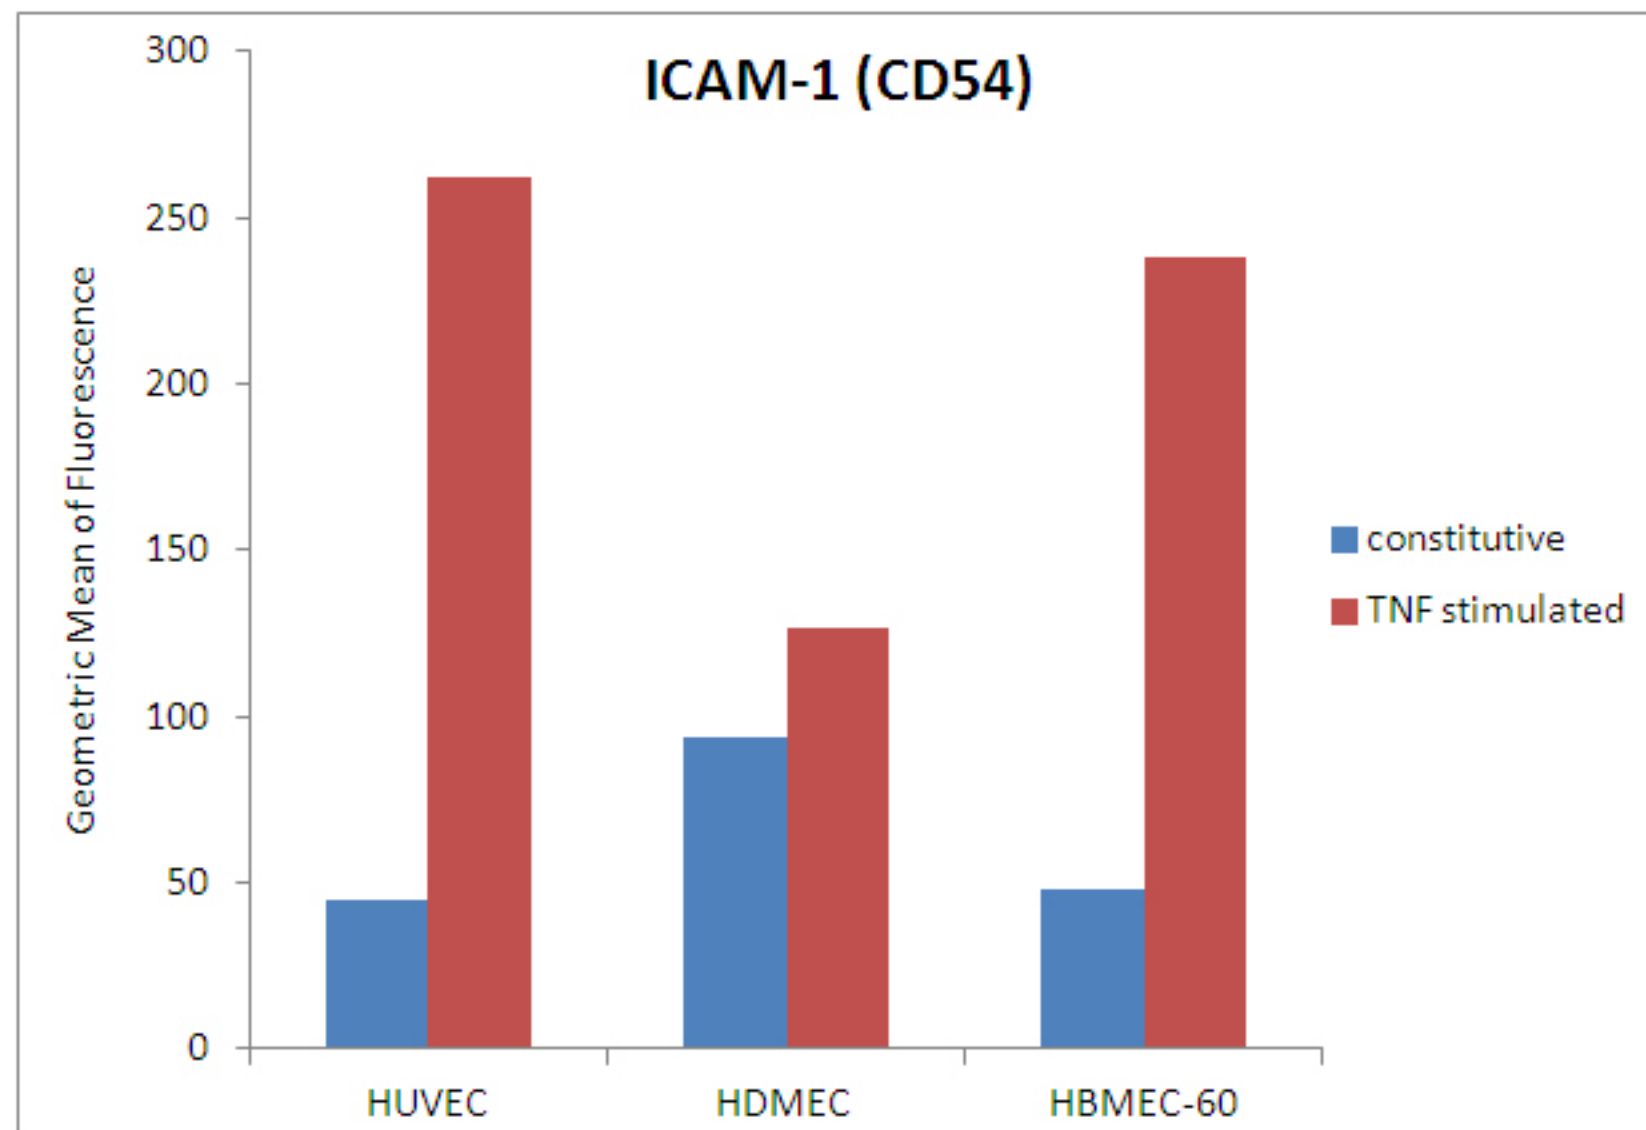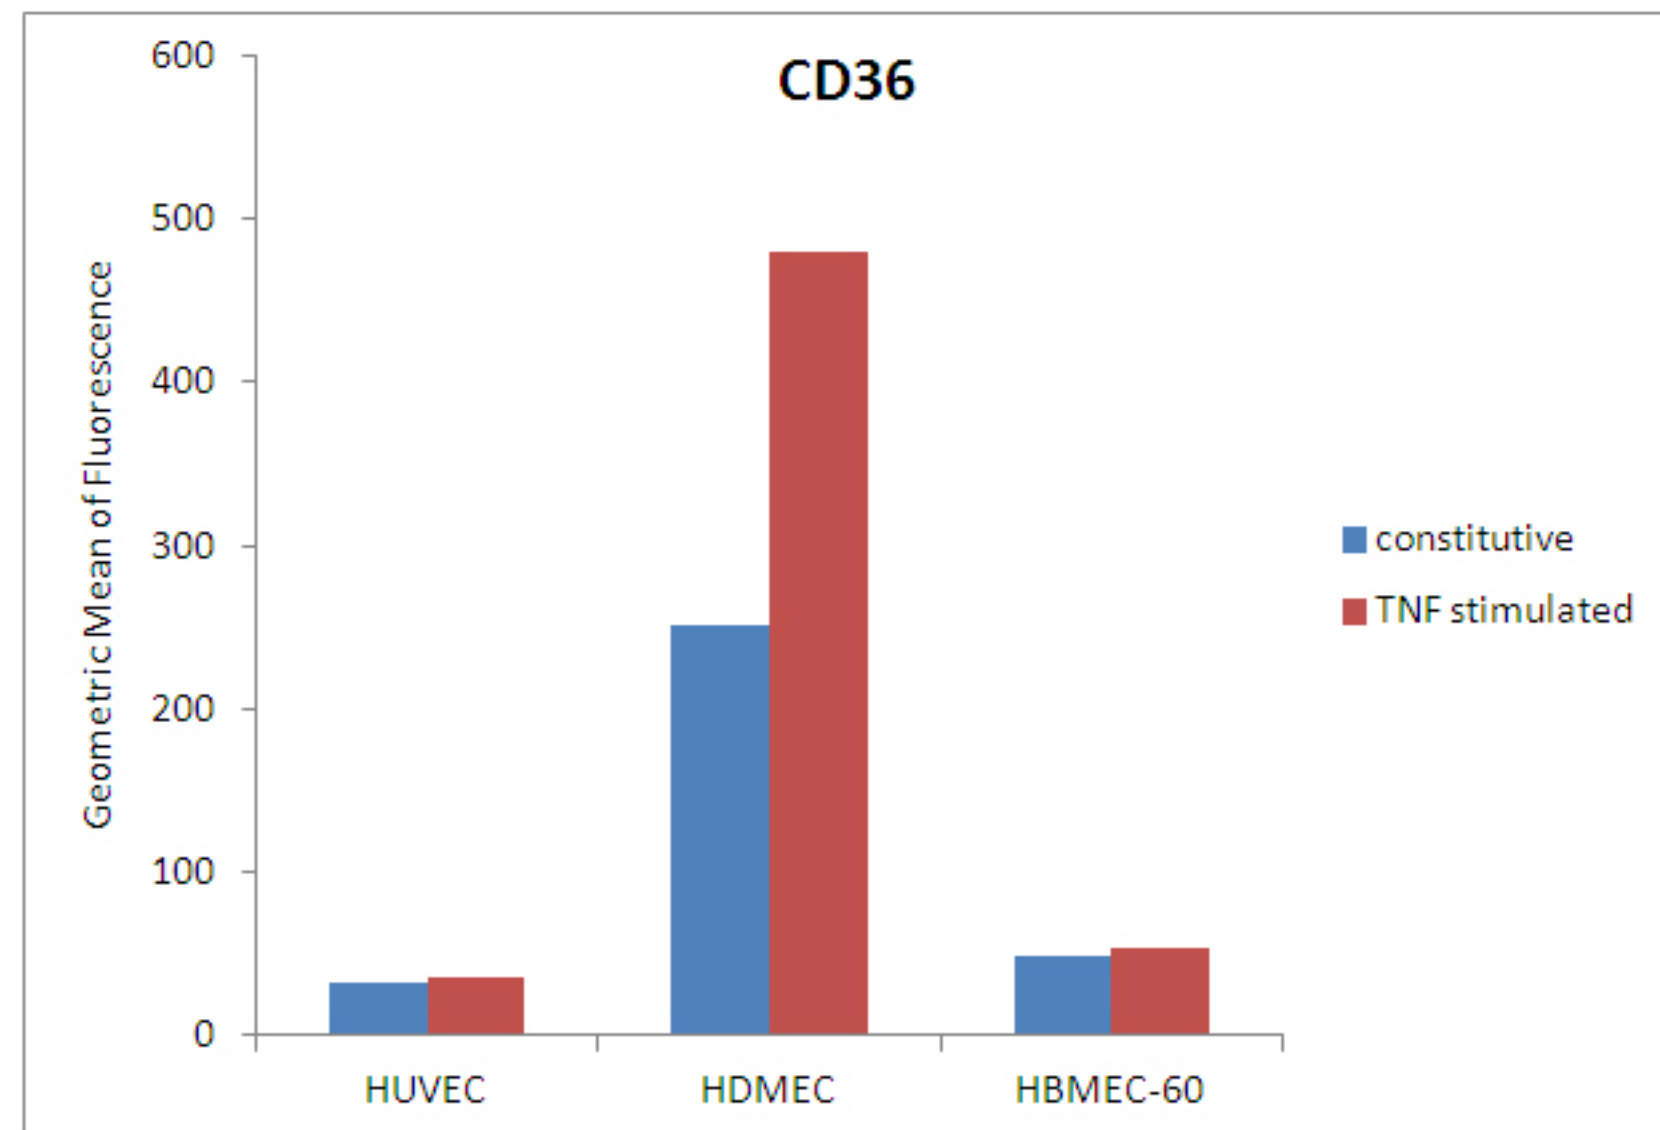

Supplement: pone.0031567.s001.pdf [file pone.0031567.s001.pdf]
